# Supplementary material for: Analysis of the genomic landscape of yolk sac tumors reveals mechanisms of evolution and chemoresistance
Source: PubMed Central journal article supplement (PMC8196104; doi:10.1038/s41467-021-23681-0), 2021-06-11
Supplement: 41467_2021_23681_MOESM3_ESM.pdf [file 41467_2021_23681_MOESM3_ESM.pdf]

## **Description of Additional Supplementary Files**

File Name: Supplementary Data 1

Description: The clinical and sequencing information of tumor samples from YST patients in this study.

File Name: Supplementary Data 2

Description: Somatic mutations identified in this study.
